# Supplementary material for: Five-minute synthesis of silver nanowires and their roll-to-roll processing for large-area organic light emitting diodes
Source: Royal Society of Chemistry journal article supplement (doi:10.1039/c8nr02242a), 2018-01-01
Supplement: c8nr02242a1.pdf [file c8nr02242a1.pdf]

Supporting Information for

**Five-minute synthesis of silver nanowires and their roll-to-roll processing for large-area organic light emitting diodes**

Hwansu Sim,<sup>‡a</sup> Chanho Kim,<sup>‡b</sup> Shingyu Bok,<sup>a</sup> Min Ki Kim,<sup>b</sup> Hwisu Oh,<sup>a</sup> Guh-Hwan Lim,<sup>a</sup> Sung Min Cho,<sup>\*b</sup> and Byungkwon Lim<sup>\*a</sup>

<sup>a</sup> School of Advanced Materials Science and Engineering, Sungkyunkwan University (SKKU), Suwon 16419, South Korea. E-mail: blim@skku.edu

<sup>b</sup> School of Chemical Engineering, Sungkyunkwan University (SKKU), Suwon 16419, South Korea. E-mail: sungmcho@skku.edu

<sup>‡</sup>These authors contributed equally to this work.

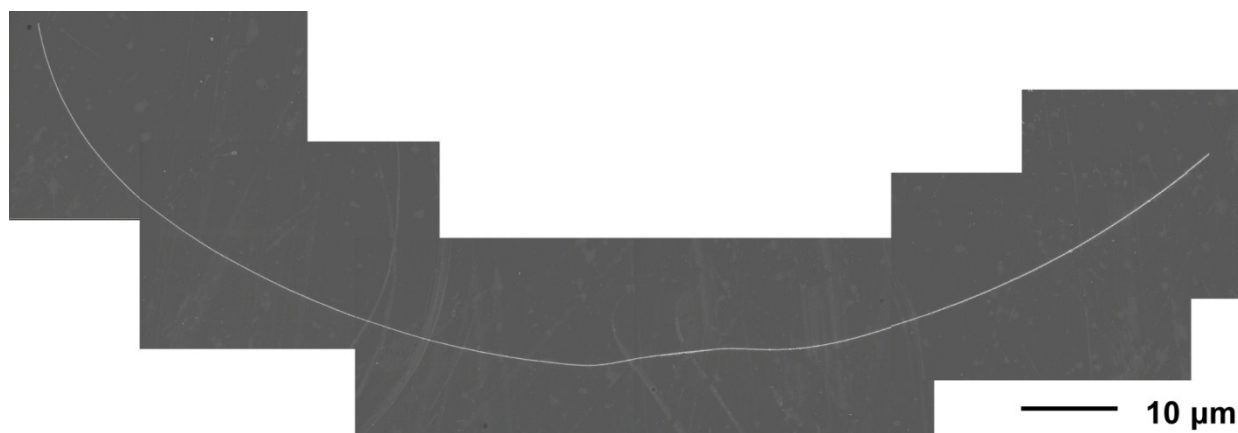

**Fig. S1.** SEM image of a single Ag NW longer than 100 μm.

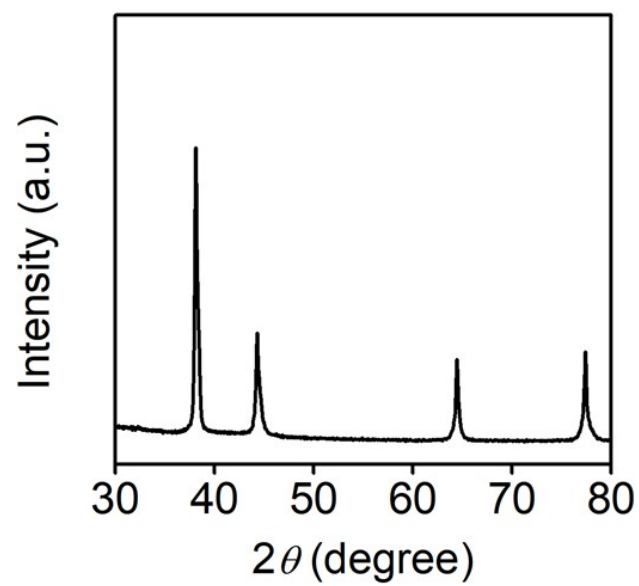

**Fig. S2.** Powder XRD pattern of the as-synthesized Ag NWs.

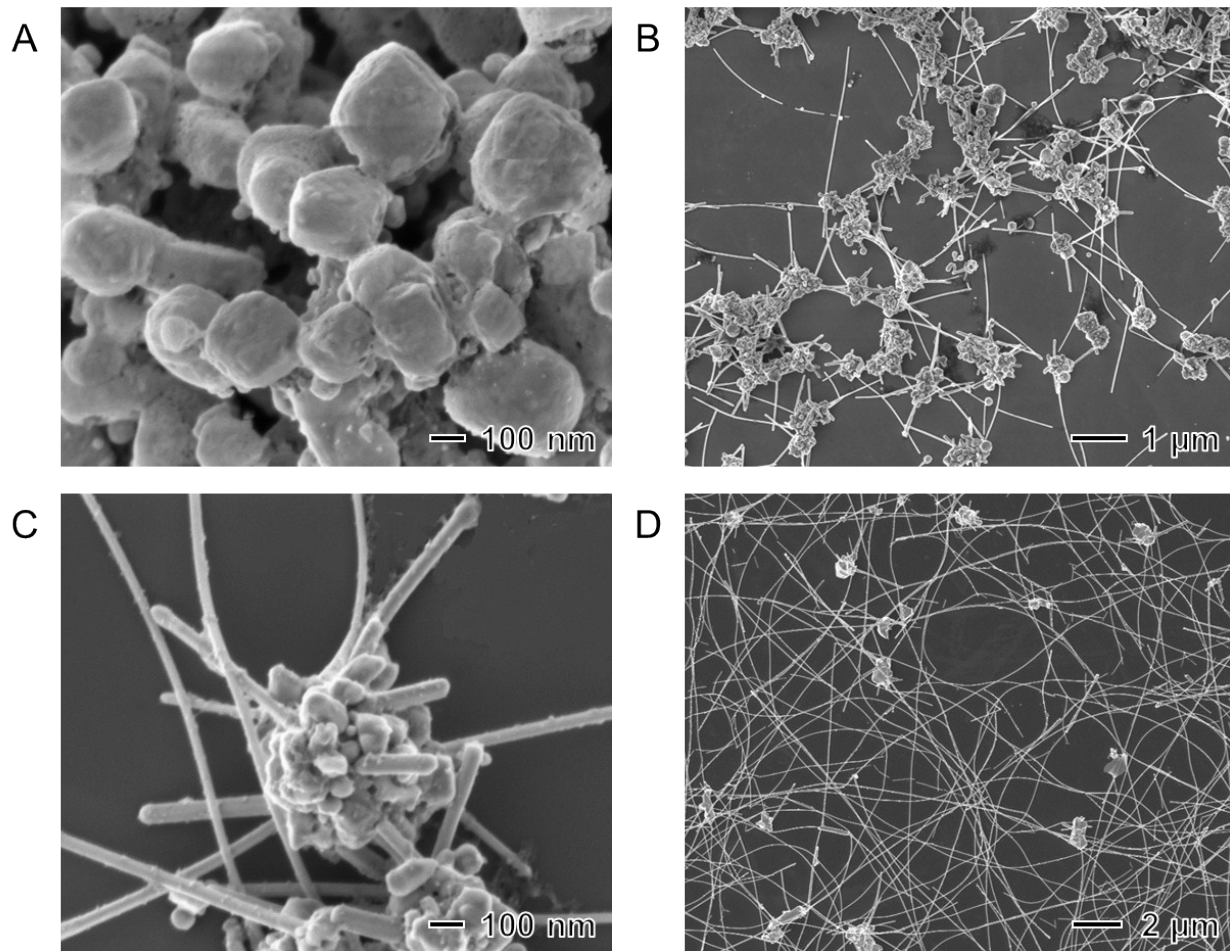

**Fig. S3.** SEM images of samples taken at different stages of the synthesis: (A) 2 min, (B, C) 3 min, and (D) 4 min.

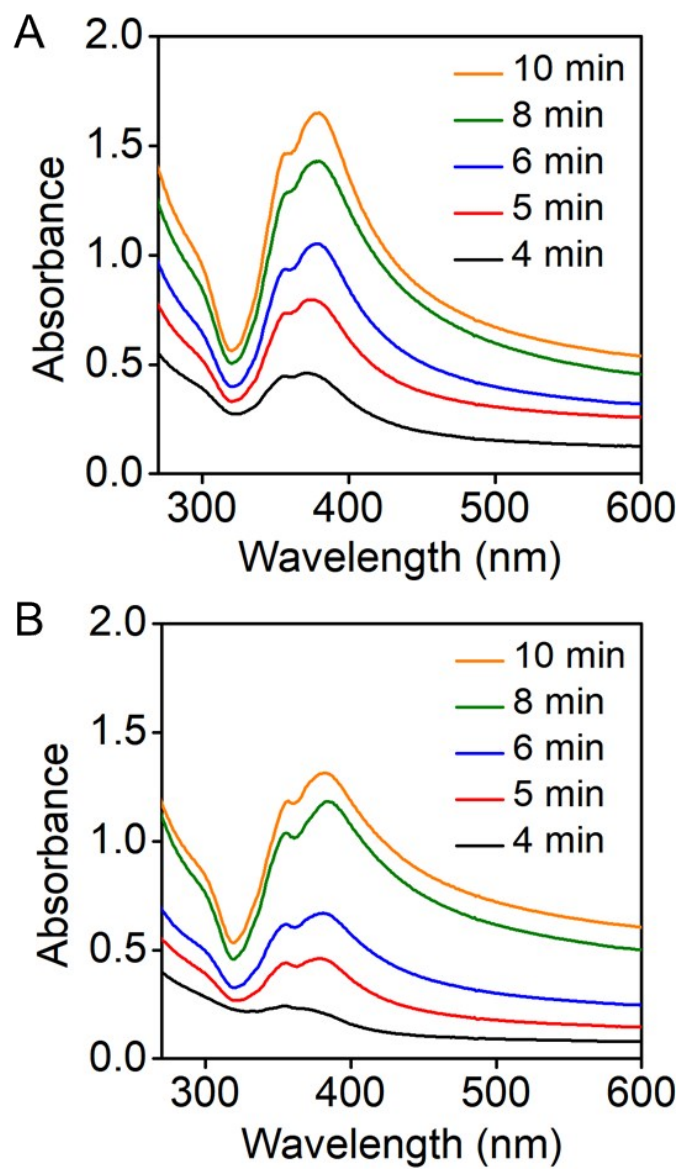

**Fig. S4.** UV/vis spectra recorded at different stages of the synthesis that had been conducted with (A) EG:PG ratio of 3:1 and (B) EG only.

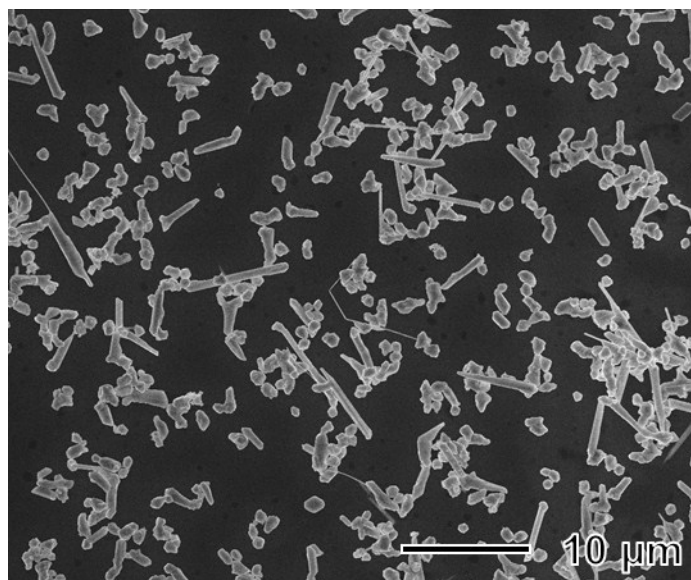

**Fig. S5.** SEM image of the product synthesized with PG in the absence of EG.

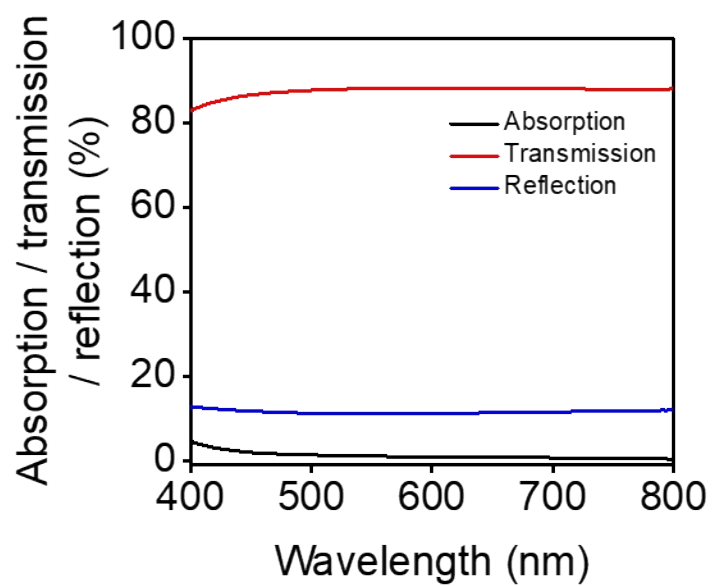

**Fig. S6.** Total absorption, reflection, and transmission spectra of the DD-stabilized Ag NW film recorded using a UV-vis spectrometer equipped with an integrating sphere.

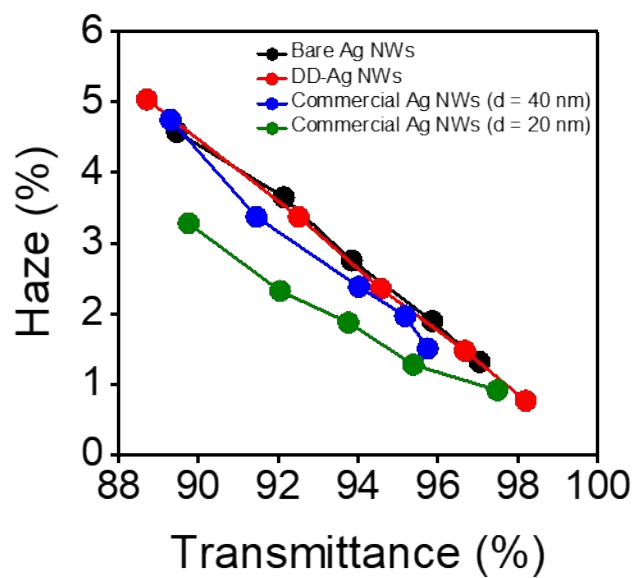

**Fig. S7.** Plots of haze versus transmittance for transparent electrodes fabricated with bare Ag NWs, DD-stabilized Ag NWs, and commercial Ag NWs with different diameters.
